# Supplementary material for: Targeting oxytocin receptor (Oxtr)-expressing neurons in the lateral septum to restore social novelty in autism spectrum disorder mouse models
Source: PubMed Central journal article supplement (PMC7746761; doi:10.1038/s41598-020-79109-0), 2020-12-17

## Title

Targeting oxytocin receptor (Oxtr)-expressing neurons in the lateral septum to restore social novelty in autism spectrum disorder mouse model

## Author names

Machi Horiai, Ayano Otsuka, Shizu Hidema, Yuichi Hiraoka, Ryotaro Hayashi, Shinji Miyazaki, Tamio Furuse, Hiroaki Mizukami, Ryoichi Teruyama, Masaru Tamura, Haruhiko Bito, Yuko Maejima, Kenju Shimomura, Katsuhiko Nishimori\*

## Legends of supplementary figures

### Supplementary figure 1

Investigation time quantified during the sociability test (2nd stage) by using the three-chamber test. Control (Ctrl)+saline, Ctrl+CNO, VPA+CNO: N = 8 per group; VPA+saline: N = 11.

### Supplementary figure 2

(A) Investigation time quantified during the sociability test (2nd stage) by using the three-chamber test of Oxtr-Cre (Ctrl) and N13<sup>R451C</sup> KI: *Oxtr*-Cre (N13:Oxtr<sup>Cre</sup>) mice. N=9 per group.

(B) Investigation time quantified during the sociability test (2nd stage) by using the single-field test. Ctrl+saline: N = 10, Ctrl+CNO: N = 15, N13:Oxtr<sup>Cre</sup>+saline: N = 10, N13:Oxtr<sup>Cre</sup>+CNO: N = 10.

### Supplementary figure 3

Expression levels of *Oxtr* (A, D), *Gad1* (B, E), and *Gad2* (C, F) genes by quantitative real-time PCR. The results of VPA-treated *Oxtr*-Cre mice were A, B, and C, and the results of NI3:*Oxtr*<sup>Cre</sup> mice were D, E, and F. Control mice (Ctrl) were *Oxtr*-Cre. N=6 per group

Supplementary figure 1

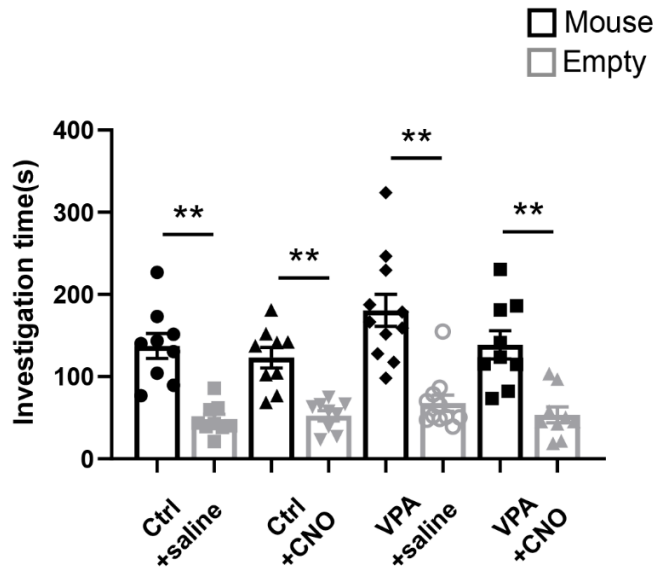

Supplementary figure 2

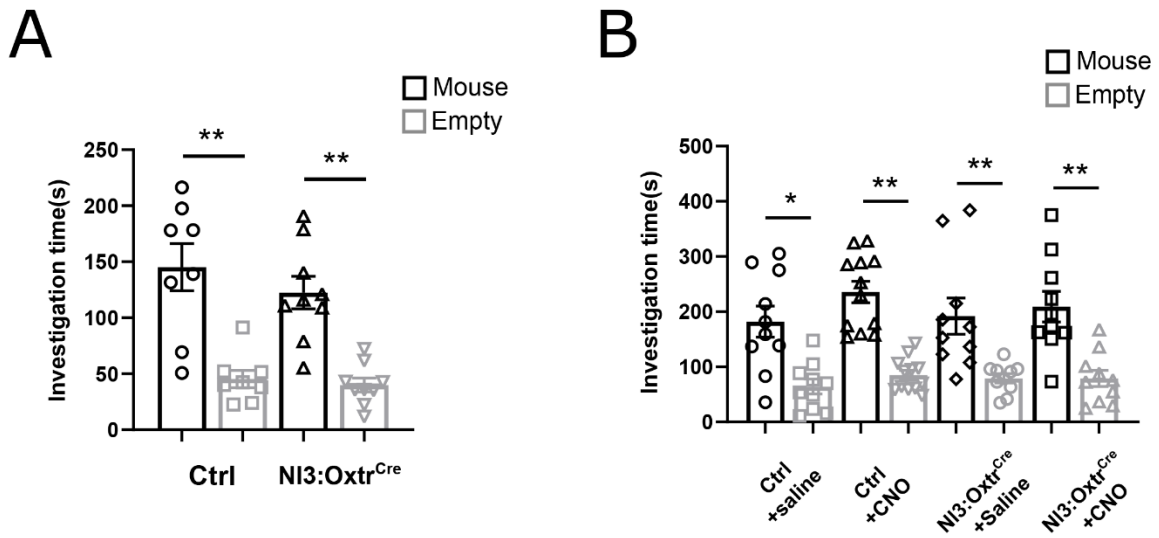

Supplementary figure 3

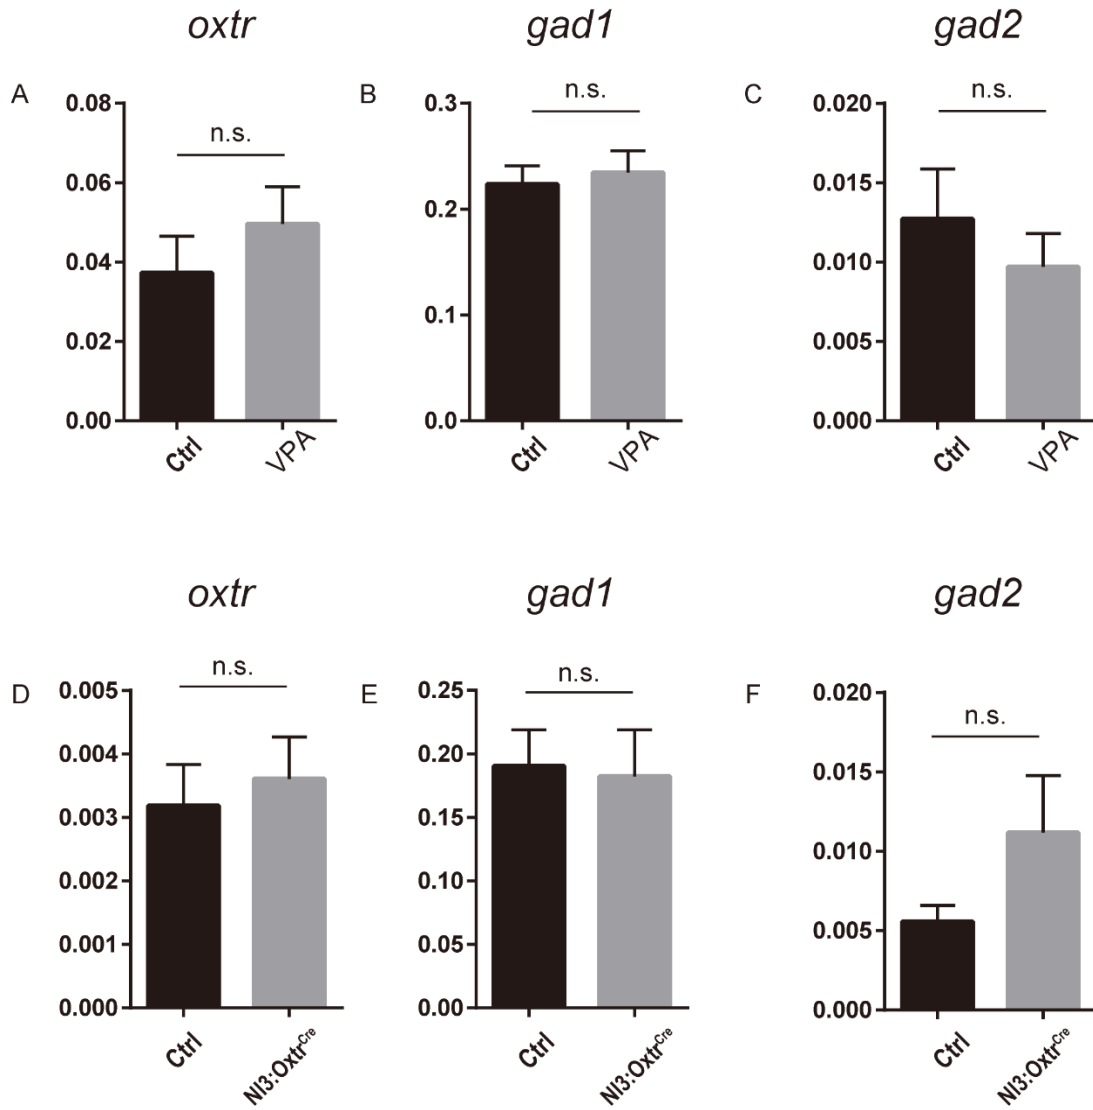

Supplement: 41598_2020_79109_MOESM1_ESM.pdf [file 41598_2020_79109_MOESM1_ESM.pdf]
